# Supplementary material for: Co-chaperone involvement in knob biogenesis implicates host-derived chaperones in malaria virulence
Source: PubMed Central journal article supplement (PMC8544838; doi:10.1371/journal.ppat.1009969), 2021-10-06
Supplement: ppat.1009969.s016.pdf [file ppat.1009969.s016.pdf]

1 **Reviewer #1 (Evidence, reproducibility and clarity (Required)):**  
2

3 **Review of "Co-chaperone involvement in knob biogenesis implicates host-derived**  
4 **chaperones in malaria virulence." by Diehl et al for Review Commons.**

5  
6 **\*\*Major Comments.\*\***  
7

8 **1. In this paper the function of Plasmodium falciparum exported protein PFA66, is**  
9 **investigated by replacing its functionally important dnaJ region with GFP. These**  
10 **modified parasites grew fine but produced elongated knob-like structures, called**  
11 **mentulae, at the surface of the parasites infected RBCs. Knobs are elevated platforms**  
12 **formed by exported parasite proteins at the surface of the infected RBC that are used**  
13 **to display PfEMP1 cytoadherence proteins which help the parasites avoid host**  
14 **immunity. The mentulae still display some PfEMP1 and contain exported proteins such**  
15 **as KAHRP but can no longer facilitate cytoadherence. Complementation of the**  
16 **truncated PFA66 with full length protein restored normal knob morphology however**  
17 **complementation with a non-functional HPD to QPD mutant did not restore normal**  
18 **morphology implying interaction of the PFA66 with a HSP70 possibly of host origin is**  
19 **important for function. While a circumstantial case is made for PFA66 interacting with**  
20 **human HSP70 rather than parasite HSP70-x, is there any direct evidence for this eg,**  
21 **protein binding evidence? I feel that without some additional evidence for a direct**  
22 **interaction between PFA66 and human HSP70 then the paper's title is a little**  
23 **misleading.**  
24

25 >We thank the reviewer for their kind words. They are correct that we do not show direct  
26 evidence of such an interaction, but would like to note that we, and others, despite concerted  
27 efforts to produce direct evidence, have always been hindered by the nature of the  
28 experimental system. As noted also in our reply to Reviewer 3, the inability to genetically  
29 modify the host cell leads us to suggest that indirect evidence is the best that can conceivably  
30 be provided at this time. Our evidence, although indirect, is the first experimental evidence for  
31 the importance of such an interaction, all other suggestions having been based on "guilt by  
32 association" i.e. protein localisation or co-IP analyses.  
33

34 **2. Was CSA binding restored upon complementation of  $\Delta$ PFA with the full-size copy of**  
35 **PFA66?**  
36

37 >As this project grew organically and was driven by the results already obtained, we decided  
38 to use knob morphology via SEM as a "proof-of-principle" to show that we could reverse the  
39 phenotype. Thus, while we cannot comment on whether ALL functions of PFA66 are  
40 complemented, we suspect that if the knobs revert to their WT morphology, this is likely to be  
41 true for the other tested phenotypes. We do not feel that revisiting all of our assays (which  
42 would basically entail repeating almost every experiment so far carried out) would really be  
43 much more informative. We have added a note in the discussion stating "*We wish to note that*  
44 *we cannot unequivocally state that our complementation construct allows reversion of all the*  
45 *aberrant phenotypes herein investigated, however we feel it likely that all abnormal*  
46 *phenotypes are linked and thus our "proof-of-principle" investigation of knob/eKnob*  
47 *phenotypes is likely to be reflected in other facets of host cell modification and can thus be*  
48 *seen as a proxy for such.*".  
49

50 **\*\*Minor Comments\*\***  
51

52 **3. Line 36, NPP should be NPPs if referring to the plural.**  
53

54 >Changed  
55

56 **4. Line 37, MC should be MCs if referring to the plural. By the way this acronym is never**  
57 **used in the text, it's always written 'Maurer's clefts'.**

58

59 >Changed

60

61 **5. Abstract, Line 52-53, could be changed to "uncover a new KAHRP-independent..." as**  
62 **it currently implies (albeit weakly) that that this is the first observation of a KAHRP-**  
63 **independent mechanism for correct knob biogenesis. Maier et al 2008, have previously**  
64 **shown that knock out of PF3D7\_1039100 (J-domain exported protein), greatly reduced**  
65 **knob size and knock out of PHISTb protein PF3D7\_0424600, resulted in knobless**  
66 **parasites.**

67

68 >Correct. In line with the suggestions of another reviewer, this section has been changed.

69

70 **6. In the Abstract it is mentioned that "Our observations open up exciting new avenues**  
71 **for the development of new anti-malarials." This is never really expanded upon in the**  
72 **rest of the paper and so seems like a bit of a throwaway line and could be left out.**

73

74 >Good point, changed

75

76 **7. Line 59, WHO world malaria report should be cited here since these numbers are**  
77 **from the report not a paper from 2002.**

78

79 >Done

80

81 **8. Line 67, Marti et al 2004 should be cited here as its published at the same time as**  
82 **Hiller et al 2004.**

83

84 >Our mistake. Done

85

86 **9. Line 76, I suggest using either 'erythrocyte' or 'red blood cell' throughout the text not**  
87 **both.**

88

89 >We now use erythrocyte throughout

90

91 **10. Line 80, Maier et al 2008 should be referenced here.**

92

93 >Done

94

95 **11. Line 87, the authors should cite Birnbaum et al 2017 for the technique used. This is**  
96 **cited immediately after (line 98) in the results section but could be addressed at both**  
97 **points in the text.**

98

99 >Done

100

101 **12. Line 123, IFAs and live cell imaging failed to detect the PFA-GFP protein and the**  
102 **author proposes this is due to low expression levels. However, PFA66 is expressed at**  
103 **~350 FPKM in the ring stage and previous studies from your own group have visualised**  
104 **it using GFP before. Is there another explanation for this such as disruption of the locus**  
105 **here has served to greatly reduce the expression level of the fusion protein?**

106

107 >The truncated protein is now distributed throughout the whole erythrocyte cytosol, not  
108 concentrated into J-dots, likely making detection difficult. We wish to note that our original  
109 GFP tagged PFA66 lines (Külzer et al, 2010) did not really show a strong signal in comparison  
110 to other lines we are used to analysing. We further believe that the sub-cellular fractionation

111 (Figure S1) demonstrates the erythrocyte cytosolic localization of the truncated PFA66. We  
112 have no evidence that truncation causes lower expression, but any future revision will include  
113 a comparison of expression levels of endogenously GFP tagged dPFA and PFA66.  
114

115 **13. Line 147, for consistency it would be best to introduce infected red blood cell (iRBC)**  
116 **at the beginning of the main text and use throughout the text instead of switching**  
117 **between 'infected human erythrocyte' and iRBC.**  
118

119 >We agree, and have changed accordingly  
120

121 **14. Line 153, Fig S2A does not exist.**  
122

123 >We apologise, this has been changed  
124

125 **15. Lines 156-158: Different knob morphologies are described with repeated reference**  
126 **to Fig2 and FigS2. Since multiple whole-cell SEM images are displayed in these figures**  
127 **it would be worth adding lettering and/or zoomed-in regions of interest highlighting**  
128 **examples of each aberrant knob type.**  
129

130 >This has now been added to Figure S2.  
131

132 **16. Line 178-179, "Although not highly abundant in either sample, the morphology of**  
133 **Maurer's clefts appeared comparable in both samples (data not shown)." Why is the**  
134 **data not shown? Representative images of Maurer's clefts from each line should be**  
135 **included in the supplementary figures or this in-text statement should more clearly**  
136 **justified.**  
137

138 >Figure S3 has been adjusted to also show Maurer's clefts in more detail. An Excel table of  
139 Data can be provided if necessary.  
140

141 **17. Line 196, indirect immunofluorescence assay (IFA).**  
142

143 >Changed  
144

145 **18. Line 201, how was the 'non-significant difference' measured? PHISTc looks quite**  
146 **different by eye. Rephrase the term "significant difference" as localisation of these**  
147 **exported proteins was compared visually rather than quantified. Otherwise, a measure**  
148 **of mean fluorescence intensity could be taken for each protein as a basic comparison**  
149 **between the two lines. In the Figure legend of S4, the term "no drastic difference", is**  
150 **used suggesting this was not quantified. By the way, PHISTc appears different by the**  
151 **represented figure.**  
152

153 >We apologise for our use of a specific term for non-statistically verified observations. The  
154 PHISTc image the reviewer comments on, was presented incorrectly (too much brightness  
155 introduced during processing) and is now correct. We mean to say that we could not (in a  
156 blinded check), tell the difference between WT and KO IFA images. Only KAHRP (in our  
157 opinion) demonstrated a different fluorescence pattern. As KAHRP has previously been  
158 implicated in knob formation, we then analysed this phenotype in more detail. A detailed  
159 analysis of the fluorescence pattern in the other IFAs does, in our eyes, not add to the story  
160 or add any real value to our observations.  
161

162 **19. Line 213, you now have 3 versions for the word wild type, 'wild type', 'wild-type' and**  
163 **'WT', best to choose one for consistency.**  
164

165 >Changed

166  
167 **20. Line 232, 'tubelike' to 'tube-like'.**  
168  
169 >Changed  
170  
171 **21. Line 279, just use 'IFA', the acronym has already been explained earlier in the text.**  
172  
173 >Changed  
174  
175 **22. Line 319, 'permeation' should be 'permeability'.**  
176  
177 >Changed  
178  
179 **23. Line 353, 'The action of host actin is known' to 'Host actin is known'.**  
180  
181 >Changed  
182  
183 **24. Line 373, 'through their role as regulators'.**  
184  
185 >Changed  
186  
187 **25. Line 402, either use 'HSP70-x' or 'HSP70-X' throughout the text.**  
188  
189 >Changed  
190  
191 **26. Line 540, the speed used to pellet the samples for sorbitol lysis assay, 1600g is**  
192 **quite high and could reflect RBC fragility rather than direct sorbitol induced lysis. The**  
193 **parasitemia is also very low, and previous published methods have used ~90%**  
194 **parasitemia rather than the 2% used here. We are not saying the method is wrong but**  
195 **please check it is accurate.**  
196  
197 >We used the method of our former colleague Stefan Baumeister (University of Marburg), who  
198 is an expert in analysis of NPP, thus we are sure the method is correct. We are in fact tempted  
199 to remove the NPP data as they deflect from the main narrative of the manuscript, this being  
200 the reason we include them only as supplementary data  
201  
202 **27. Line 479, 10µm should be 10 µM.**  
203  
204 >Changed  
205  
206 **28. In Fig 1A, the primers A, B, C etc are not explained anywhere that I can see.**  
207  
208 >This information has now been included in the 1A Figure legend and table 2A.  
209  
210 **29. Figure 1B, I do not see any clear band for the 3' integration indicated with the \*. Can**  
211 **a better image be shown?**  
212  
213 >We apologise. Integration PCRs are notoriously challenging. Any revised manuscript will  
214 include better quality images  
215  
216 **30. It seems from Fig 3G,H,I that the KAHRP puncta are bigger in ΔPFA but are as**  
217 **abundant as CS2. Given that KAHRP is associated with knobs how do you reconcile**  
218 **this with there being fewer knobs per unit area in ΔPFA compared to CS2 as in Fig 2B?**  
219 **The numbers of knobs/KAHRP spots/Objects per um<sup>2</sup> seems to vary between Fig 2 and**  
220 **3. Please provide some commentary about this.**

221  
222 >We are not sure if all KAHRP spots actually label eKnobs, and it is possible that there are  
223 KAHRP “foci” that are not associated with eKnobs. We also wish to note that the data in figure  
224 2 and 3 were produced using very different techniques. Sample preparation may lead to  
225 membrane shrinkage or stretching, and the different microscopy techniques have very  
226 different levels of resolution. For this reason we do not believe that the data from these very  
227 different independent experiments can be compared, however a comparison within a data set  
228 is possible and good practice.

229  
230 **31. In the bottom panels of Fig 4, KAHRP::mCherry appears to extend beyond the**  
231 **glycocalyx beyond the cell. Is this an artifact?**

232  
233 >We checked assembly of the figure and are sure that this was not introduced during  
234 production of the figure. Our only explanation is that WGA does not directly stain the  
235 erythrocyte membrane, but the glycocalyx. A closer examination of the WGA signal reveals  
236 that it is weaker at this point (and also in the eKnobs i, ii) so potentially the KAHRP signal is  
237 beneath the erythrocyte plasma membrane, but the membrane cannot be visualised at this  
238 point.

239  
240 **32. Line 837, does this refer to 10 technical replicates or was the experiment repeated**  
241 **on 10 independent occasions? This should at least be done in 2 biological replicates**  
242 **given the range in technical replicates on the graph. Was CS2 considered as '100%**  
243 **lysis' or the water control described in the method? Please provide more detail.**

244  
245 >This figure is the result of 10 biological and 4 technical replicates. A number of data points  
246 were removed as lying outside normal distribution (Gubbs test). The highest value within a  
247 biological replicate was set to 100% to allow comparison of results. This has now been  
248 corrected in the text.

249  
250 **Reviewer #1 (Significance (Required)):**

251  
252 **This is a reasonably significant publication as it describes knob defects that to my**  
253 **knowledge have never been observed before. Importantly, the deletion of the J domain**  
254 **from PFA66 is genetically complemented to restore function really confirming a role for**  
255 **this protein in knob development. Amino acids critical for the function of the J-domain**  
256 **are also resolved. Apart from some minor technical and wording issues the paper is**  
257 **really nice work apart from one area which is the proposed partnership of PFA66 with**  
258 **human HSP70 for which there is not much direct evidence. If this evidence can be**  
259 **provided, we think this work could be published in a high impact journal. Without the**  
260 **evidence, it could find a home in a mid-level journal with some tempering of the claims**  
261 **of PFA66's interaction with human HSP70.**

262  
263 **\*\*Referee Cross-commenting\*\***

264  
265 **There seems to be a high degree of similarity in the reviewers' comments and I think as**  
266 **many issues as possible should be addressed. I definitely agree that the term mentula**  
267 **should be not be used.**

268  
269 >We have now adopted the suggestion of Reviewer 3, and use the term eKnobs.

270  
271  
272

273 **Reviewer #2 (Evidence, reproducibility and clarity (Required)):**  
274

275 *Plasmodium falciparum* exports several proteins that contain J-domains and are  
276 hypothesized to act as co-chaperones to support partner HSP70s chaperones in the  
277 host erythrocyte, but the function of these co-chaperones is largely unknown. Here the  
278 authors provide a functional analysis of one of these exported HSP40 proteins known  
279 as PFA66 by using the selection-linked integration approach to generate a truncation  
280 mutant lacking the C-terminal substrate binding domain. While there is no fitness cost  
281 during in vitro culture, light and electron microscopy analysis of this mutant reveals  
282 defects in knob formation that produces a novel, extended knob morphology and  
283 ablates Var2CSA-mediated cytoadherence. These knob formation defects are distinct  
284 from previous mutants and this unique phenotype is exploited by the authors to show  
285 that the HSP70-stimulating "HPD" motif of PFA66 impacts rescue of the altered knob  
286 phenotype. In other HSP40 co-chaperones, this motif is critical to stimulate partner  
287 HSP70 activity, suggesting that PFA66 acts as a bona fide co-chaperone. Importantly,  
288 previous work by the Przyborski lab and others has shown that deletion PfHSP70x, the  
289 only HSP70 exported by the parasite, does not phenocopy the PFA66 mutant, implying  
290 that the partner HSP70 is of host origin. The results are exciting but I have some  
291 concerns about controls needed to properly interpret the functional complementation  
292 experiments. My specific comments are below.  
293

294 >We agree that some control experiments are missing, and these will be included in any future  
295 revision.

296 **\*\*Major comments\*\***  
297

298  
299 - The failure of the HPD mutant PFA66 to rescue the knob-defect is very interesting.  
300 However, the authors need to determine that the HPA mutant is expressed at the same  
301 level as the WT (by quantification against the loading controls in the western blots in  
302 Fig 1D and Fig S6H) and is properly exported (by IFA and/or WB on fractionated iRBCs,  
303 as done for the GFP-fused truncation in Fig S1A). Otherwise, the failure to rescue is  
304 hard to interpret. If these controls were in place, the conclusion that a host HSP70 is  
305 likely being hijacked by PFA66 is appropriate. This genetic data would be greatly  
306 strengthened by in vitro experiments with recombinant protein showing activation of a  
307 host HSP70 by PFA66, but I realize this may be out of the scope of the present study.  
308 Along these lines, it might be worth discussing the finding by Daniyan et al 2016 that  
309 recombinant PFA66 was found to bind human HSPA1A with similar affinity to PfHSP70x  
310 but did not substantially stimulate its ATPase activity, suggesting this is not the  
311 relevant host HSP70. This study is cited but the details are not discussed.  
312

313 >As in our answer to Reviewer 1, we will examine the expression and localisation of both WT  
314 and mutant PFA66.

315  
316 We are currently expressing and purifying a number of HSP40/70 combinations for exactly the  
317 kind of analysis suggested and hope to include such data in future revisions, but as the  
318 reviewer fairly notes, this is really beyond the scope of the current study.  
319

320 Regarding Daniyan et al (and other) papers: The fact that PFA66 can stimulate PfHSP70x  
321 does not preclude that it also interacts with human HSP/HSC70, and indeed there is some  
322 stimulation of human HSP70. Daniyan and colleagues did steady-state assays in the absence  
323 of nucleotide exchange factors. Therefore, the stimulation of human HSP/HSC70 is not very  
324 prominent. One should either do single-turnover experiments or add a nucleotide exchange  
325 factor to make sure that nucleotide exchange does not become rate-limiting for ATP  
326 hydrolysis. This is completely independent of the results for PfHSP70-X the intrinsic nucleotide  
327 exchange rates of the studied HSP70s could be very different. Also, it is important to

328 understand that J-domain proteins generally do not stimulate ATPase activity much by  
329 themselves but in synergism with substrates, allowing the possibility that such an *in vitro* assay  
330 may not reflect the situation *in cellula*. Additionally the resonance units in the SPR analysis for  
331 PFA66-HsHSP70 are lower than those for PFA66-PfHSP70-X. This could mean that PFA66  
332 is a good substrate for PfHSP70-X but not for HsHSP70, but this does not mean that PFA66  
333 does not cooperate with HsHSP70.

334

335 **- The authors claim that truncation of PFA66 alters the localization of KAHRP but not**  
336 **the other exported proteins they evaluated by IFA (Fig S4). This seems baseless as they**  
337 **don't apply the same imageJ evaluation to these other proteins. Similarly, the statement**  
338 **that KAHRP structures "appear by eye to have a lower circularity, although we were not**  
339 **able to substantiate this with image analysis" is subjective/qualitative and should**  
340 **probably be removed.**

341

342 >We mean to say that we could not (in a blinded check), tell the difference between WT and  
343 KO IFA images. Only KAHRP (in our opinion) demonstrated a different fluorescence pattern.  
344 As KAHRP has previously been implicated in knob formation, we then analysed this phenotype  
345 in more detail. A detailed analysis of the fluorescence pattern in the other IFAs does, in our  
346 eyes, not add to the story or add any real value to our observations.

347

348 The statement on the circularity has been removed according to the reviewers wishes.

349

350 **-The section title "Chelation of membrane cholesterol...causes reversion of the mutant**  
351 **phenotype in  $\Delta$ PFA" seems an overstatement given the MBCD effect on the knob**  
352 **morphology is fairly weak and remains significantly abnormal.**

353

354 >The title of this section was misleading, we agree. We have retitled it "*Chelation of membrane*  
355 *cholesterol but not actin depolymerisation or glycocalyx degradation causes partial reversion*  
356 *of the mutant phenotype in  $\Delta$ PFA"* to clarify that the reversion was only partial (as explained  
357 by the following text in the manuscript).

358

359 **\*\*Minor comments\*\***

360

361 **- The DNA agarose gel image in Fig 1B is not very convincing. Most of the bands are**  
362 **faint and there is a lot of background/smear signal in the lanes. Also, it would help for**  
363 **clarity if the primer pairs used for each reaction were stated as shown in the diagram**  
364 **(rather than simply "WT", "5' Int" and "3' Int").**

365

366 >We apologise. Integration PCRs are notoriously challenging. Any revised manuscript will  
367 feature clearer images.

368

369 **- Given the vulgar connotation of "mentula", the authors might consider an alternative**  
370 **term.**

371

372 >We have now adopted the term "eKnobs" suggested by Reviewer 3.

373

374 **- lines 67-69: The authors may wish to cite a more recent review that takes into account**  
375 **updated Plasmepsin 5 substrate predication from Boddey et al 2013 (PMID: 23387285).**  
376 **For example, Boddey and Cowman 2013 (PMID: 23808341) or de Koning-Ward et al 2016**  
377 **(PMID: 27374802).**

378

379 >A fair point, we have now added Koning-Ward.

380

381 **- lines 77-79: "deleted" is repetitive in this sentence.**

382

383 >Changed

384

385 - line 115: It might be clearer to state "endogenous PFA66 promoter"

386

387 >Changed

388

389 - lines 131-132: "...these data suggests that deletion of the SBD of PFA66 leads to a  
390 non-functional protein." Behl et al 2019 (PMID: 30804381) showed the recombinant C-  
391 terminal region of PFA66 (residues 219-386, including the SBD truncated in the present  
392 study) binds cholesterol. The authors may wish to mention this along with their  
393 reference to Kulzer et al 2010 showing PFA66 segregates with the membrane fraction,  
394 suggesting cholesterol is involved in J-dot targeting.

395

396 >We should have noted this connection and thank the reviewer for bringing it to our attention.  
397 This section has been revised to include this important information.

398

399 - line 198: It's not clear what is meant by "+ve" here and afterward. Please define.

400

401 >We have now changed this to "structures labelled by anti-KAHRP antibodies", or merely  
402 "KAHRP".

403

404 - lines 749-750: "Production of PFA and NEO as separate proteins is ensured with a  
405 SKIP peptide". Translation of the 2A peptide does not always cause a skip (see PMID:  
406 24160265) and often yields only about 50% skipped product (for example, PMID:  
407 31164473). Because of the close cropping in the western blots in Fig 1C or S1A this is  
408 difficult to assess. Is a larger unskipped product also visible? Beyond this one point, it  
409 is general preferable that the blots not be cropped so close.

410

411 >A very valid point, and in other parasite lines we have indeed detected non-skipped protein.  
412 In our case, we visualise a band at the predicted molecular mass for the skipped dPFA<sup>GFP</sup> and  
413 the commonly observed circa. 26kDa GFP degradation product. The full-length blots have  
414 now been included as supplementary data (Figure S7).

415

416 - lines 867-868: Explain more clearly what "Cy3-caused fluorescence" is measuring.

417

418 >The Cy3 channel refers to anti-var2CSA staining, and we have now included this information.

419

420 - Several figure legends would benefit from a title sentence describing what the figure  
421 is about (ie, Fig legends 1, 3, 5, S1, S5 & S6)

422

423 >This has been added.

424

425 **Reviewer #2 (Significance (Required)):**

426

427 **This manuscript by Diehl et al reports on the function of the exported P. falciparum J-**  
428 **domain protein PFA66 in remodeling the infected RBC. Obligate intracellular malaria**  
429 **parasites export effector proteins to subvert the host erythrocyte for their survival. This**  
430 **process results in major renovations to the erythrocyte, including alteration of the host**  
431 **cell cytoskeleton and formation of raised protuberances on the host membrane known**  
432 **as knobs. Knobs serve as platforms for presentation of the variant surface antigen**  
433 **PfEMP1, enabling cytoadherence of the infected RBC to the host vascular endothelium.**  
434 **This process is of great interest as it is critical for parasite survival and severe disease**  
435 **during in vivo infection. The basis for trafficking of exported effectors within the**  
436 **erythrocyte after they are translocated across the vacuolar membrane is not well**  
437 **understood but is known to involve chaperones. This is a particularly interesting study**



438 in that it provides evidence in support of the hypothesis, initially proposed nearly 20  
439 years ago, that the parasite hijacks host chaperones to remodel the erythrocyte. This  
440 is biologically intriguing and also suggests new therapeutic strategies targeting host  
441 factors that would not be subjected to escape mutations in the parasite genome. The  
442 work will be of interest to the those studying exported protein trafficking and/or  
443 virulence in Plasmodium (such as this reviewer) as well as the broader chaperone and  
444 host-pathogen interaction fields.

445  
446 **\*\*Referee Cross-commenting\*\***

447  
448 I also agree with similarity in comments. Some additional discussion on the failure to  
449 localize the PFA66 truncation by live FL is warranted, as noted by reviewer #1. Seems  
450 likely that either the level of PFA66 protein is reduced by the truncation or the truncated  
451 PFA66 is dispersed from J-dots and harder to visual when diffuse instead of punctate.  
452 In either case, the complementing copy (WT or QPD) should be visualized by IFA.

453  
454 >As noted above, we believe our inability to visualize the truncated protein is likely due to its  
455 dispersal throughout the whole erythrocyte cytosol as opposed to lower expression levels, but  
456 we will be checking this, and also the localisation of WT and mutant PFA66 complementation  
457 chimera and expect to have this result for the next revision.

458  
459  
460  
461  
462  
463

464 **Reviewer #3 (Evidence, reproducibility and clarity (Required)):**

465

466 **The data are for the most part well controlled and reveal a potential function for PFA66**  
467 **in knob formation. The assays are state of the art and the data provides insight into**  
468 **knob formation.**

469

470 **However, some conclusions are not fully supported by the data. For example, 'uncover**  
471 **a KAHRP-independent mechanism for correct knob biogenesis' (line 52-53) is not**  
472 **supported by the data because PFA66 truncation could result in misfolding of KAHRP**  
473 **and thus lead to knob biogenesis defects.**

474

475 >We meant to imply that not only perturbations/absence of KAHRP lead to aberrant knobs.  
476 This is now changed to "...uncover a new KAHRP-independent molecular factor required for  
477 correct knob biogenesis."

478

479 **The other major issue is that despite having a complemented parasite line in hand, the**  
480 **parental parasite line is used as a control for almost all assays. This is a critical issue**  
481 **because an alternative explanation for their data would be that expression of truncated**  
482 **PFA66 leads to expression of a misfolded protein that aggregates in the host RBC OR**  
483 **it clogs up the export pathway and indirectly leads to knob biogenesis defects. It is**  
484 **surprising that the authors do not test the localization of dPFA using microscopy**  
485 **especially since it is tagged with GFP. While the complemented parasite line does revert**  
486 **back, this could also be due to the fact that the complement overexpresses the**  
487 **chaperone helping mitigate issues caused by the truncated protein.**

488

489 >As all virulence characteristics we monitor in this study have been verified many times in the  
490 parental CS2 parasites in the literature, we think that the best comparative control is indeed  
491 the truncated cell line. The large part of our study aimed to characterize differences in various  
492 characteristics upon inactivation of PFA66 function, and for this reason we used the parental  
493 WT line as a control. Using the complementation line would not truly reflect the effect of PFA66  
494 truncation, as PFA66::HA was not expressed from an endogenous locus, but rather from an  
495 episomal plasmid. This itself may result in expression levels which differ from WT, and thus  
496 this parasite line cannot be seen as the gold-standard control for assaying PFA66 function.

497

498 We did indeed try to localize dPFA (lines 122-123 in the original manuscript), but were  
499 unsuccessful, likely due to diffusion of dPFA throughout the entire erythrocyte cytosol (as  
500 opposed to concentration into J-dots as the WT). For this reason we carried out fractionation  
501 instead, and could show that dPFA is soluble within the erythrocyte cytosol. This experiment  
502 additionally excludes any blockage of the export pathway as no dPFA was associated with the  
503 pellet/PV fraction. Other proteins were still exported as normal (Figure S4), further supporting  
504 a functional export pathway. Indeed, as reported by ourselves and our colleagues (particularly  
505 from the Spielmann laboratory, Mesen-Ramirez et al 2016, Grüning et al 2012), blockage of  
506 the export pathway is likely to lead to non-viable parasites as the PTEX translocon seems to  
507 be the bottleneck for export of a number of proteins, many of which are essential for parasite  
508 survival.

509

510 **Reviewer #3 (Significance (Required)):**

511

512 **The malaria-causing parasite extensively modifies the host red blood cell to convert**  
513 **the host into a suitable habitat for growth as well as to evade the immune response. It**  
514 **does so by exporting several hundred proteins into the host cell. The functions of these**  
515 **proteins remain mostly unknown. One parasite-driven modification, essential for**  
516 **immune evasion, is the assembly of 'knob' like structures on the RBC surface that**  
517 **display the variant antigen PfEMP1. How these knobs are assembled and regulated is**  
518 **unknown.**

519 **In the current manuscript, Diehl et al target an exported parasite chaperone from the**  
520 **Hsp40 family, termed PFA66. The phenotypic observations described in the manuscript**  
521 **are quite spectacular and well characterized. The truncation of PFA66 results in some**  
522 **abnormal knob formation where the knobs are no longer well-spaced and uniform but**  
523 **instead sometimes form tubular structures termed mentulae. The mechanistic**  
524 **underpinnings driving the formation of mentulae remain to be understood but that will**  
525 **probably several more manuscripts to be deciphered.**

526  
527 >We thank the reviewer for their kind comments, and also for the recognition that this current  
528 manuscript is merely the exciting beginning of a story!

529  
530 **\*\*Major Comments:\*\***

531  
532 >General comment on the use of controls: The large part of our study aimed to  
533 characterize differences in various characteristics upon inactivation of PFA66 function, and for  
534 this reason we used the parental WT line as a control. Using the complementation line as a  
535 control in this context would not truly reflect the effect of PFA66 truncation, as PFA66::HA was  
536 not expressed from an endogenous locus, but rather from an episomal plasmid. This itself  
537 may result in expression levels which differ from WT, and thus this parasite line cannot be  
538 seen as the gold-standard control for assaying PFA66 function. Our complementation  
539 experiments were initially designed to verify that phenotypic changes ONLY related to  
540 inactivation of PFA66 function and were (as unlikely as this is) not due to second site changes  
541 during the genetic manipulation process. To avoid lengthy and not really very informative  
542 analysis of the complementation line, we used knob morphology via SEM as a “proof-of-  
543 principle”. However, as the reviewer is formally correct, we have added a passage to the  
544 discussion stating that *“We wish to note that we cannot unequivocally state that our  
545 complementation construct caused reversion of all the aberrant phenotypes herein  
546 investigated, however we feel it likely that all abnormal phenotypes are linked and thus our  
547 “proof of principle” investigation of knob/eKnob phenotypes is likely to be reflected in other  
548 facets of host cell modification and can thus be seen as a proxy for such.”*.

549  
550 **Fig 3: The control used here is the parental line. Was there a reason why the**  
551 **complemented parasite line was not used as the control? Showing that the KAHRP**  
552 **localization and distribution is restored upon complementation would greatly increase**  
553 **the confidence in the phenotype.**

554  
555 >Please see our general comments above.

556  
557 **Fig 5: The data showing a defect in CSA binding are convincing but again only the**  
558 **parental control is used and not the complemented parasite line. The complemented**  
559 **parasite line should be used as a control for the PFA binding mutant.**

560  
561 >Please see our general comments above, and also our reponse to reviewer 1.

562  
563 **In 5D, the defect in dPFA seems to be occur to a lesser degree than Fig. 2C. How many**  
564 **biological replicates are shown in each of these figures? The figure legend says 20 cells**  
565 **were quantified via IFA but were these cells from one experiment? The expression of**  
566 **mentulae seems quite variable, while the authors mention '22%' (line 164), it seems in**  
567 **most other experiments, its more ~10% (5D and S6B, D-E). Were these experiments**  
568 **blinded?**

569  
570 >As the reviewer is likely aware, subtle differences in parasite culture conditions, stage,  
571 fixation, SEM conditions and length of time in culture between time experimental time points  
572 can lead to variations in results. Due to the time required to generate the data for figure 5,  
573 these experiments took place months after the original (i.e. Figure 2C) analysis. It is not

574 possible to directly compare the results of these two independent experiments, however it is  
575 possible to compare the results of the parasite lines included within each set of experimental  
576 data. Due to the time and cost involved, each of these experiments represents only one  
577 biological replicate. If required, we can include more replicates, although this is more likely to  
578 further complicate the situation due to the reasons mentioned above.  
579

580 **Fig S6G: The staining suggests that most PfEMP1 in is not exported, in any parasite**  
581 **line. Staining for PfEMP1 is technically challenging and these data are not enough to**  
582 **show that expression level is 'similar' (Line 279-280). It may be more feasible to use the**  
583 **anti-ATS antibody and stain for the non-variant part of PfEMP1 (Maier et al 2008, Cell).**  
584

585 >It is well known that a large portion of PfEMP1 remains intracellular. This figure does not aim  
586 to differentiate between surface exposed and internal PfEMP1, but merely to show that similar  
587 TOTAL PfEMP1 is expressed in the deletion line, and also that the parasites have not  
588 undergone a switching event which would lead to loss of CSA binding ability. We will  
589 endeavour to address this in future revisions by Western Blot but wish to note that WB analysis  
590 of PfEMP1 is notoriously difficult.  
591

592 **Lines 320-322: The logic of why increased robustness of the RBC membrane would**  
593 **lead to faster parasite growth is confusing. It is likely that the loss of PfEMP1**  
594 **expression leads to faster growth. The loss of NPP is minimal and may not cause**  
595 **growth defects in rich media.**  
596

597 >As far as we can detect, there is no loss of total PfEMP1 expression (as verified by figure  
598 S6G), but rather a drop in surface exposure and functionality, which is unlikely to affect  
599 parasite growth rates. What we intended to say was that the NPP assay is influenced by  
600 fragility of the erythrocyte, and therefore a stiffer erythrocyte may be more resistant to sorbitol-  
601 induced lysis. As the NPP result does not really add much to the main narrative of this  
602 manuscript, we would prefer not to invest unnecessary effort for a minimal potential readout.  
603 Indeed, we are tempted to remove the NPP data as they deflect from the main findings of the  
604 manuscript, this being the reason we include them only as supplementary data  
605

606 **Lines 433-434: These data do support a function for HsHsp70 but these data are among**  
607 **many others that have previously provided circumstantial evidence for its role in host**  
608 **RBC modification. May be a co-IP would help support these conclusions better.**  
609

610 >Despite all our best efforts and publications, we have been unable to detect this interaction  
611 in co-IP or crosslink experiments, although we were successful in detecting interactions  
612 between another HSP40 (PFE55) and HsHSP70 (Zhang et al, 2017). Although this is  
613 disappointing, it may be explained due to the transient nature of HSP40/HSP70 interactions.  
614 We agree that our suggestion (that parasite HSP40s functionally interact with human HSP70)  
615 is not novel (we and others have noted this possibility for over 10 years), however the  
616 challenging nature of the experimental system makes it very difficult to show direct evidence  
617 of the importance of this interaction *in cellula*. Over the past decade we have use numerous  
618 experimental approaches to try to address this but have always been confounded by technical  
619 challenges. In 2017 the corresponding author took a sabbatical to attempt manipulation of  
620 hemopoietic stem cells to reduce HSP70 levels in erythrocytes, however it appears  
621 (unsurprisingly) that HsHSP70 is required for stem cell differentiation, and thus this tactic was  
622 not followed further. The authors believe that, due to the lack of the necessary technology,  
623 indirect evidence for this important interaction is all that can realistically be achieved at this  
624 time, and this current study is the first to provide such evidence.

625 We would further like to note that a successful co-IP would not directly verify a functional  
626 interaction between PFA66 and HsHSP70, but could also reflect a chaperone:substrate  
627 interaction between these proteins, and is therefore not necessarily informative.

628  
629  
630  
631  
632  
633  
634  
635  
636  
637  
638  
639  
640  
641  
642  
643  
644  
645  
646  
647  
648  
649  
650  
651  
652  
653  
654  
655  
656  
657  
658  
659  
660  
661  
662  
663  
664  
665  
666  
667  
668  
669  
670  
671  
672  
673  
674  
675  
676  
677  
678  
679  
680  
681  
682

**\*\*Minor Comments:\*\***

**Fig1: The bands are hard to see in WT and 3'Int. May be a better resolution figure would help? Also, the schematic shows primers A-D but the figure legend does not refer to them. It would be useful to the reader to have the primers indicated above the PCR gel along with the expected sizes.**

>We apologise. Integration PCRs are notoriously challenging. Any revised manuscript will contain clearer images.

**Fig S1: The NPP data could be improved if tested in minimal media. It has been shown that NPP defects do not show up in rich media (Pillai et al 2012, Mol. Pharm. PMID: 22949525). Does complementation restore NPP and growth rate?**

> As the NPP result does not really add much to the main narrative of this manuscript, we would prefer not to invest unnecessary effort for a minimal potential readout. Indeed, we are tempted to remove the NPP data as they deflect from the main findings of the manuscript, this being the reason we include them only as supplementary data. Likewise the complementation experiments are, we feel, unnecessary.

**Fig 4: It is not clear what the line scan analysis are supposed to show. What does 'value' on the y-axis mean?**

>These are line scans of fluorescence intensity (arbitrary units) along the yellow arrows shown on the fluorescent panels. This is now indicated in the figure legend.

**Fig S5D: Maybe it was a problem with the file but no actin staining is visible.**

>The actin stain was visible on the screen, but unfortunately not in the PDF. We have applied (suitable) enhancement to produce the images in the new version.

**Fig 6: A model for mentulae formation is not really proposed. Only what the authors expect the mentulae to look like.**

>We have changed the legend to reflect this "Figure 6. Proposed model for eKnob formation and structure.". We do propose that runaway extension of an underlying spiral protein may lead to eKnobs, thus would like to keep the word "formation".

**Lines 312-313: It is not clear what 'highly viable' means, parasites are either viable or not.**

>This has been changed.

**Lines 400-405: The authors forgot to cite a complementary paper that showed no virulence defect upon 70x knockout or knockdown (Cobb et al mSphere 2017). Those data also support a role for HsHsp70.**

>We apologise for the omission. This is now included.

**\*\*Referee Cross-commenting\*\***

I agree, the comments are pretty similar. The authors could tone down their conclusions or add more data to support their conclusions. May be call them elongated knobs or eKnobs, instead of mentula?

683

684 >We have now removed the offending term and use eKnobs.
